# Supplementary material for: Increased Ca2+ influx through CaV1.2 drives aortic valve calcification
Source: PubMed Central journal article supplement (PMC8983132; doi:10.1172/jci.insight.155569), 2022-03-08
Supplement: jciinsight-7-155569-s191.pdf [file jciinsight-7-155569-s191.pdf]

## SUPPLEMENTAL DATA FOR

### **Increased Ca<sup>2+</sup> influx through Cav1.2 drives aortic valve calcification**

Maiko Matsui<sup>1</sup>, Rihab Bouchareb<sup>2</sup>, Mara Storto<sup>1</sup>, Yasin Hussain<sup>1</sup>, Andrew Gregg<sup>1</sup>, Steven O. Marx<sup>3</sup> and Geoffrey S. Pitt<sup>1,2</sup>

From the <sup>1</sup>Cardiovascular Research Institute, Weill Cornell Medicine, New York, NY; <sup>2</sup>Zena and Michael A. Wiener Cardiovascular Institute, Icahn School of Medicine at Mount Sinai, New York, NY; and <sup>3</sup>Division of Cardiology, Department of Medicine, and Department of Pharmacology, Vagelos College of Physicians and Surgeons, Columbia University, New York, NY

**Supplemental Table S1.** Collagen genes up-regulated more than two-fold after infection with adenovirus expressing *Cre* recombinase.

| <i>Gene</i>    | <b>Log<sub>2</sub>Fold<br/>Change</b> | <b>P<sub>adj</sub></b> |
|----------------|---------------------------------------|------------------------|
| <i>Col1a1</i>  | 1.18±0.10                             | 4.40E-247              |
| <i>Col4a4</i>  | 1.93±0.05                             | 5.40E-11               |
| <i>Col5a2</i>  | 2.72±0.04                             | 3.37E-166              |
| <i>Col5a3</i>  | 1.01±0.03                             | 5.24E-120              |
| <i>Col6a3</i>  | 2.29±0.14                             | 5.27E-247              |
| <i>Col7a1</i>  | 2.16±1.33                             | 1.80E-49               |
| <i>Col8a2</i>  | 2.26±0.08                             | 1.37E-21               |
| <i>Col9a3</i>  | 2.56±0.14                             | 1.01E-34               |
| <i>Col11a2</i> | 2.11±0.20                             | 1.17E-110              |
| <i>Col12a1</i> | 1.36±0.05                             | <1.0E-300              |
| <i>Col13a1</i> | 1.96±0.08                             | 1.09E-15               |
| <i>Col16a1</i> | 2.58±0.08                             | 3.16E-149              |
| <i>Col18a1</i> | 2.30±0.06                             | <1.0E-300              |
| <i>Col20a1</i> | 3.71±0.24                             | 2.42E-74               |
| <i>Col26a1</i> | 1.42±0.17                             | 1.77E-03               |
| <i>Col27a1</i> | 1.18±0.10                             | <1.0E-300              |
| <i>Col28a1</i> | 1.26±0.04                             | 1.84E-24               |

**Supplemental Table S2.** Expression of altered RAAS signaling components after infection with adenovirus expressing *Cre* recombinase.

| <b>Gene</b>    | <b>Log<sub>2</sub>Fold<br/>Change</b> | <b>P<sub>adj</sub></b> |
|----------------|---------------------------------------|------------------------|
| <i>Agt</i>     | 8.99±0.17                             | <1.0E-300              |
| <i>Ace2</i>    | 4.32±0.16                             | 2.3E-155               |
| <i>Atp6ap2</i> | 2.05±0.04                             | <1.0E-300              |
| <i>Agtrap</i>  | 0.46±0.06                             | 1.1E-11                |
| <i>Renbp</i>   | 0.33±0.05                             | 7.74E-11               |
| <i>Agtr1a</i>  | -2.3±0.22                             | 1.19E-26               |
| <i>Agtr1b</i>  | -2.5±0.85                             | 9.42E-05               |

**Supplemental Table S3.** Ca<sup>2+</sup> sensitive genes (from: [http://software.broadinstitute.org/gsea/msigdb/cards/KEGG\\_CALCIIUM\\_SIGNALING\\_PATHWAY](http://software.broadinstitute.org/gsea/msigdb/cards/KEGG_CALCIIUM_SIGNALING_PATHWAY)).

| <b>Gene</b>    | <b>Log<sub>2</sub>Fold Change</b> | <b>P<sub>adj</sub></b> |
|----------------|-----------------------------------|------------------------|
| <i>Nfatc2</i>  | 6.08±0.40                         | 2.28E-54               |
| <i>Atp2a3</i>  | 5.52±0.19                         | 7.19E-187              |
| <i>P2rx1</i>   | 4.96±1.11                         | 1.70E-08               |
| <i>Atp2a1</i>  | 4.84±0.62                         | 3.05E-17               |
| <i>Grpr</i>    | 4.43±0.38                         | 1.83E-32               |
| <i>Mylk</i>    | 3.52±0.11                         | 1.86E-222              |
| <i>Cacna1s</i> | 3.09±1.25                         | 8.11E-05               |
| <i>P2rx5</i>   | 3.02±0.14                         | 4.58E-98               |
| <i>Gna14</i>   | 2.91±0.84                         | 8.81E-06               |
| <i>Rcan1</i>   | 2.73±0.07                         | 2.48E-296              |
| <i>Adecy4</i>  | 2.42±0.34                         | 1.56E-13               |
| <i>Gna15</i>   | 2.40±0.24                         | 2.56E-24               |
| <i>Tnnc2</i>   | 2.19±1.43                         | 1.21E-03               |
| <i>Ptger1</i>  | 2.13±0.16                         | 2.70E-41               |
| <i>Cacna1c</i> | 2.09±0.03                         | 0.00E+00               |
| <i>P2rx3</i>   | 2.05±0.12                         | 1.35E-62               |
| <i>Camk2a</i>  | 2.05±0.11                         | 3.81E-67               |
| <i>Nos2</i>    | 1.99±1.37                         | 1.87E-03               |
| <i>Nfatc1</i>  | 1.85±0.05                         | 3.85E-211              |
| <i>Rcan2</i>   | 1.80±0.09                         | 1.02E-89               |
| <i>Bst1</i>    | 1.75±0.24                         | 2.21E-14               |
| <i>Mylk2</i>   | 1.65±0.64                         | 2.09E-04               |
| <i>Cacna1g</i> | 1.47±0.04                         | 1.39E-209              |
| <i>Camkk1</i>  | 1.45±0.08                         | 1.13E-70               |
| <i>Tbxa2r</i>  | 1.42±0.13                         | 7.06E-29               |
| <i>P2rx6</i>   | 1.40±0.17                         | 5.11E-17               |
| <i>Cacna1b</i> | 1.38±0.40                         | 1.39E-05               |
| <i>Prkcg</i>   | 1.37±0.19                         | 8.86E-15               |
| <i>Adrb2</i>   | 1.32±0.15                         | 2.16E-19               |
| <i>Calr</i>    | 1.20±0.04                         | 1.65E-160              |
| <i>Phkg1</i>   | 1.16±0.22                         | 5.91E-09               |
| <i>Gna11</i>   | 1.16±0.03                         | 3.24E-223              |
| <i>Nfatc4</i>  | 1.11±0.03                         | 5.71E-187              |
| <i>Atp2b3</i>  | 1.07±1.09                         | 1.94E-02               |
| <i>Adra1b</i>  | -1.2±0.18                         | 3.14E-14               |
| <i>Mylk3</i>   | -1.3±0.36                         | 2.04E-06               |
| <i>Adora2b</i> | -1.4±0.11                         | 7.25E-41               |
| <i>Adrb1</i>   | -1.4±0.47                         | 3.54E-05               |
| <i>Oxtr</i>    | -1.7±0.75                         | 4.00E-04               |
| <i>Htr2a</i>   | -1.9±0.10                         | 5.80E-82               |
| <i>Adecy8</i>  | -1.9±0.18                         | 7.57E-29               |
| <i>Plcb1</i>   | -2.1±0.13                         | 3.83E-61               |
| <i>Grin2a</i>  | -2.2±1.28                         | 7.91E-04               |
| <i>Htr2b</i>   | -2.4±0.43                         | 1.50E-09               |
| <i>Adora2a</i> | -2.6±0.27                         | 5.93E-22               |

**Supplemental Table S4.** Primers used for quantification of mRNA expression by qRT-PCR.

| <b>Gene name</b>     | <b>Forward primer (5' 3')</b> | <b>Reverse primer (5' 3')</b> | <b>Primerbank ID (66, 67)</b> |
|----------------------|-------------------------------|-------------------------------|-------------------------------|
| <i>Asma (acta2)</i>  | GTCCCAGACATCAGG<br>GAGTAA     | TCGGATACTTCAGCG<br>TCAGGA     | -                             |
| <i>Runx2</i>         | TTCAACGATCTGAGA<br>TTTGTGGG   | GGATGAGGAATGCG<br>CCCTA       | -                             |
| <i>Vwf</i>           | CTTCTGTACGCCTCA<br>GCTATG     | GCCGTTGTAATTCCC<br>ACACAAG    | 33186908a1                    |
| <i>Pecam1 (cd31)</i> | ACGCTGGTGCTCTAT<br>GCAAG      | TCAGTTGCTGCCCAT<br>TCATCA     | 26332198a1                    |
| <i>P4hal</i>         | AGCCACCATTTCAAA<br>CCCAGT     | GCCAAGCACTTTTGC<br>TAATTCTG   | 33859596a1                    |
| <i>Cacna1c</i>       | GCTGACGGTGTCCA<br>GTGTA       | CCAGGTAGCCTTTGA<br>GATCTTCT   | -                             |
| <i>Gapdh</i>         | TGTCAGCAATGCATC<br>CTGCA      | CCGTTTCAGCTCTGGG<br>ATGAC     | -                             |

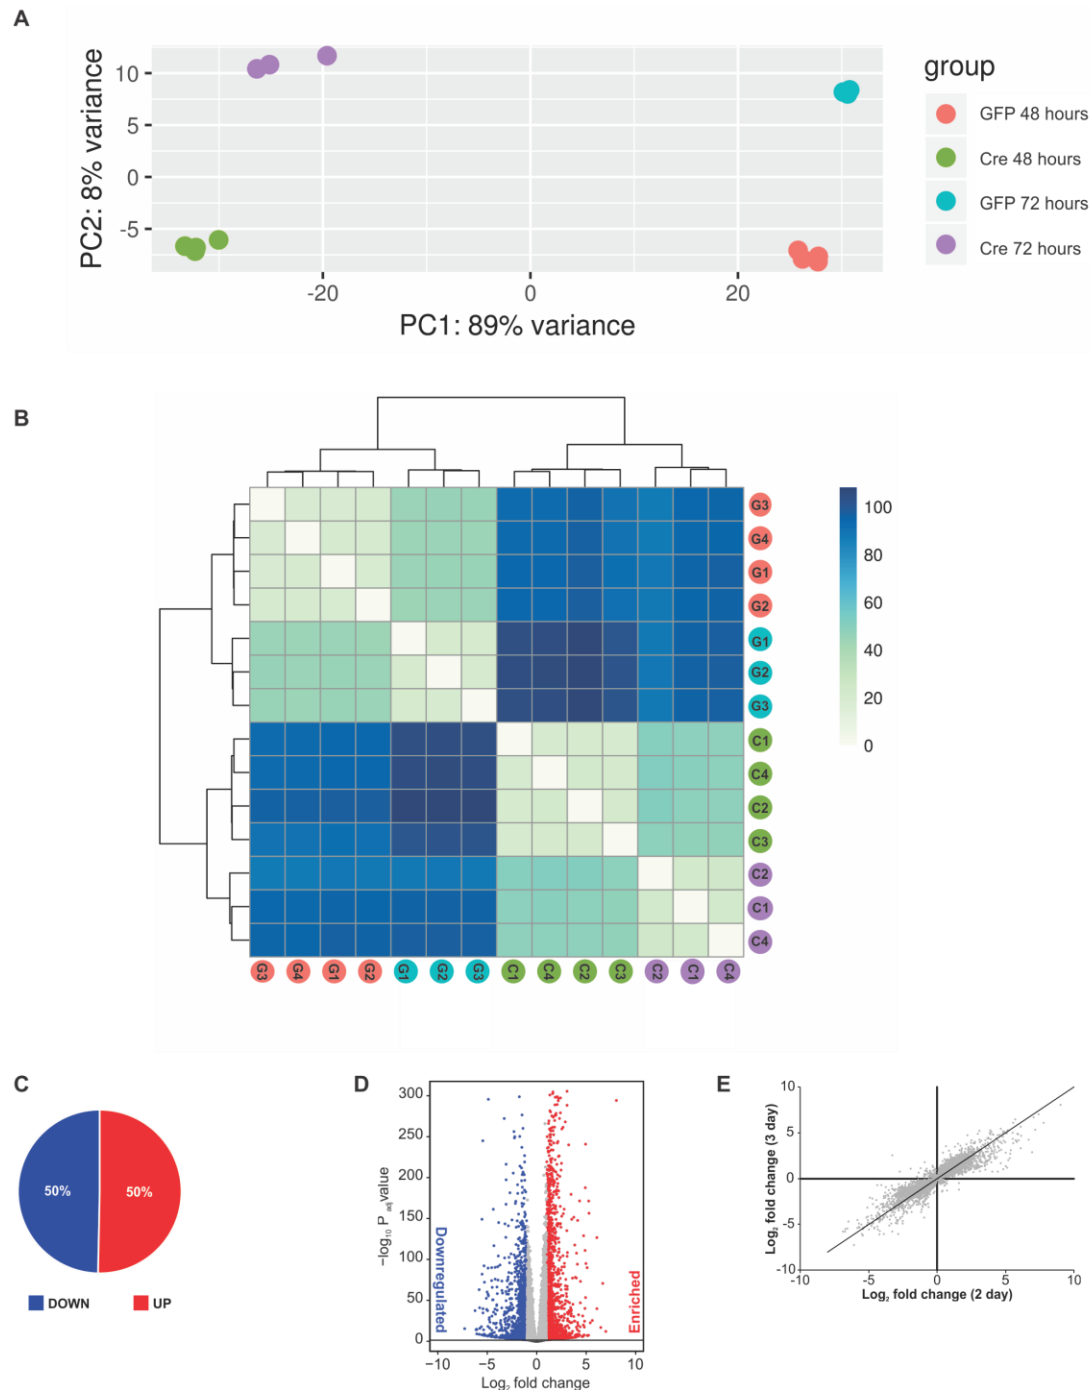

**Figure S1: RNA-Seq of cultured valve interstitial cells.** **A**, PCA of RNA transcripts isolated from VICs infected with adenovirus expressing Cre recombinase or GFP either 48h ( $N=4$  each) or 72h ( $N=3$  each) post infection. **B**, Heatmap of sample-to-sample distances. The analysis separates groups by the treatment (GFP ["G"] or Cre ["C"]) and the duration of treatment (48h or 72h). **C**, Distribution of up-regulated and down-regulated differentially expressed genes 72h after viral infection. **D**, Volcano plot of differentially expressed genes 72 h after infection. Gray indicates genes differentially expressed ( $P_{adj} < 0.05$ ) and  $\text{Log}_2\text{fold} < 1.0$  or  $> 1.0$ . **E**, Comparison of  $\text{Log}_2\text{fold}$  changes in 48h (2 day) and 72 h (3 day) datasets.
